# 1 **Allele specific expression and methylation** 2 **in the bumblebee, *Bombus terrestris***

3 **Zoë N. Lonsdale<sup>1</sup>, Kate D. Lee<sup>2</sup>, Maria Kyriakidou<sup>1</sup>, Harindra E.**  
4 **Amarasinghe<sup>3</sup>, Despina Nathanael<sup>1</sup>, Catherine J. O'Connor<sup>4</sup>, and**  
5 **Eamonn B. Mallon<sup>1</sup>**

6 <sup>1</sup>**Department of Genetics and Genome Biology, University of Leicester, Leicester, U.K.**

7 <sup>2</sup>**Bioinformatics and Biostatistics Support Hub (B/BASH), University of Leicester,**  
8 **Leicester, U.K.**

9 <sup>3</sup>**Academic Unit of Cancer Sciences, University of Southampton, Southampton, U.K.**

10 <sup>4</sup>**Cardiff School of Biosciences, Cardiff University, Cardiff, U.K.**

11 Corresponding author:

12 Eamonn B. Mallon<sup>1</sup>

13 Email address: [ebm3@le.ac.uk](mailto:ebm3@le.ac.uk)

## 14 **ABSTRACT**

15 The social hymenoptera are emerging as models for epigenetics. DNA methylation, the addition of a  
16 methyl group, is a common epigenetic marker. In mammals and flowering plants methylation affects  
17 allele specific expression. There is contradictory evidence for the role of methylation on allele specific  
18 expression in social insects. The aim of this paper is to investigate allele specific expression and  
19 monoallelic methylation in the bumblebee, *Bombus terrestris*. We found nineteen genes that were both  
20 monoallelically methylated and monoallelically expressed in a single bee. Fourteen of these genes  
21 express the hypermethylated allele, while the other five express the hypomethylated allele. We also  
22 searched for allele specific expression in twenty-nine published RNA-seq libraries. We found 555 loci  
23 with allele-specific expression. We discuss our results with reference to the functional role of methylation  
24 in gene expression in insects and in the, as yet unquantified, role of genetic cis effects in insect allele  
25 specific methylation and expression.

## 26 **INTRODUCTION**

27 Epigenetics is the study of heritable changes in gene expression that do not involve changes to the  
28 underlying DNA sequence (Goldberg et al., 2007). Social hymenoptera (ants, bees, and wasps) are  
29 important emerging models for epigenetics (Glastad et al., 2011; Weiner and Toth, 2012; Welch and Lister,  
30 2014; Yan et al., 2014). This is due to theoretical predictions for a role for an epigenetic phenomenon,  
31 genomic imprinting (parent of origin allele specific expression), in their social organisation (Queller,  
32 2003), the recent discovery of parent-of-origin allele specific expression in honeybees (Galbraith et al.,  
33 2016), and data showing a fundamental role in social insect biology for DNA methylation, an epigenetic  
34 marker (Chittka et al., 2012).

35 In mammals and flowering plants, allele specific expression is often associated with methylation  
36 marks passed from parents to offspring (Reik and Walter, 2001). However DNA methylation is involved  
37 in numerous other cellular processes (Bird, 2002). There is contradictory evidence for the role of  
38 methylation on allele specific expression in social insects. Methylation is associated with allele specific  
39 expression in a number of loci in the ants *Camponotus floridanus* and *Harpegnathos saltator* (Bonasio  
40 et al., 2012). Recently, we found evidence for allele specific expression in bumblebee worker reproduction  
41 genes (Amarasinghe et al., 2015) and that methylation is important in bumblebee worker reproduction  
42 (Amarasinghe et al., 2014). However, other work on the honeybee *Apis mellifera* found no link between  
43 genes showing allele specific expression and known methylation sites in that species (Kocher et al., 2015).

44 The presence of allele specific expression does not necessarily mean an epigenetic process is involved.  
45 Allele specific expression is known to be caused by a number of genetic as well as epigenetic processes  
46 (Palacios et al., 2009). The genetic process usually involves cis effects such as transcription factor binding

47 sites, or less often, untranslated regions which alter RNA stability or microRNA binding (Farh et al.,  
48 2005).

49 The aim of this paper is to investigate allele specific expression and methylation in the bumblebee,  
50 *Bombus terrestris*. The recently sequenced genome of the bumblebee, *Bombus terrestris* displays a full  
51 complement of genes involved in the methylation system (Sadd et al., 2015). An extreme form of allele  
52 specific expression involves monoallelic expression, where one allele is completely silenced. In the  
53 canonical mammal and flowering plant systems, this is often associated with monoallelic methylation.  
54 In this paper, we examined the link between monoallelic methylation and monoallelic expression in  
55 the bumblebee, *Bombus terrestris* using an integrative approach previously used in human epigenetic  
56 studies (Harris et al., 2010). Namely, we compare two types of whole methylome libraries and an  
57 RNA-seq library from the same individual. In humans, this integrative approach has been independently  
58 validated by clonal bisulphite sequencing (Harris et al., 2010). MeDIP-seq is an immunoprecipitation  
59 technique that creates libraries enriched for methylated cytosines (Harris et al., 2010). Methyl-sensitive  
60 restriction enzymes can create libraries that are enriched for non-methylated cytosines (MRE-seq) (Harris  
61 et al., 2010). Genes found in both libraries are predicted to be monoallelically methylated, with the  
62 putatively hypermethylated allele being in the MeDIP-seq data and the putatively hypomethylated allele  
63 in the MRE-seq data (Harris et al., 2010). Monoallelic expression was identified in these loci from the  
64 RNA-seq library. If only one allele was expressed then we knew that these loci were both monoallelically  
65 methylated and monoallelically expressed in this bee. We confirmed this monoallelic expression in one  
66 locus using qPCR.

67 We then more generally searched for allele specific expression by analysing twenty nine published  
68 RNA-seq libraries from worker bumblebees (Harrison et al., 2015; Riddell et al., 2014). We identified  
69 heterozygotes in the RNA-seq libraries and measured the expression of each allele. We then identified  
70 loci that showed significant expression differences between their two alleles.

## 71 MATERIALS AND METHODS

### 72 Samples

73 Data from twenty-nine RNA-seq libraries were used for the allele specific expression analysis (six from  
74 Harrison *et al.* (Harrison et al., 2015), and twenty-three from Riddell *et al.* (Riddell et al., 2014).  
75 The Riddell bees came from two colonies, one commercially reared bumblebee colony from Koppert  
76 Biological Systems U.K. and one colony from a wild caught queen from the botanic gardens, Leicester.  
77 The Harrison bees were from four commercially reared colonies obtained from Agralan Ltd. A Koppert  
78 colony worker bee was used for the MeDIP-seq / MRE-seq / RNA-seq experiment. Bees from three  
79 different Koppert colonies were used for the qPCR analysis. Samples are outlined in Table 1. Colonies  
80 were fed *ad libitum* with pollen (Percie du sert, France) and 50 % diluted glucose/fructose mix (Meliose –  
81 Roquette, France). Before and during the experiments colonies were kept at 26°C and 60% humidity in  
82 constant red light.

### 83 Next generation sequencing

#### 84 MeDIP-seq, MRE-seq and RNA-seq

85 RNA and DNA was extracted from a single five day old whole bee (Colony K2). DNA was extracted  
86 using an ethanol precipitation method. Total RNA was extracted using Tri-reagent (Sigma-Aldrich, UK).

87 Three libraries were prepared from this bee by Eurofins genomics. These were MeDIP-seq and  
88 MRE-seq libraries on the DNA sample and one amplified short insert cDNA library with size of 150-  
89 400 bp on the RNA sample. Both the MeDIP-seq and MRE-seq library preparations are based on  
90 previously published protocols (Harris et al., 2010). MeDIP-seq uses monoclonal antibodies against  
91 5-methylcytosine to enrich for methylated DNA independent of DNA sequence. MRE-seq enriches  
92 for unmethylated cytosines by using methylation-sensitive enzymes that cut only restriction sites with  
93 unmethylated CpGs. Each library was individually indexed. Sequencing was performed on an Illumina  
94 HiSeq®2000 instrument (Illumina, Inc.) by the manufacturer's protocol. Multiplexed 100 base paired-  
95 read runs were carried out yielding 9390 Mbp for the MeDIP-seq library, 11597 Mbp for the MRE-seq  
96 library and 8638 Mbp for the RNA-seq library.

**Table 1. Bees used in each experiment.** K refers to Koppert, A to Agralan and Q to the wild caught Leicester queen.

| Experiment                         | Number | Colony | Tissue     |
|------------------------------------|--------|--------|------------|
| Allele specific expression RNA-seq | 1      | A1     | Whole body |
|                                    | 2      | A2     | Whole body |
|                                    | 2      | A3     | Whole body |
|                                    | 1      | A4     | Whole body |
|                                    | 14     | K1     | Abdomen    |
|                                    | 9      | Q1     | Abdomen    |
| MeDip/MRE/RNA-seq                  | 1      | K2     | Whole body |
| qPCR                               | 2      | K3     | Head       |
|                                    | 1      | K4     | Head       |
|                                    | 1      | K5     | Head       |

97 **Previously published RNA-seq**

98 Full details of the RNA-seq protocols used have been published previously (Harrison et al., 2015;  
99 Riddell et al., 2014). Briefly, for the Riddell bees, total RNA was extracted from twenty three individual  
100 homogenised abdomens using Tri-reagent (Sigma-Aldrich, UK). TruSeq RNA-seq libraries were made  
101 from the 23 samples at NBAF Edinburgh. Multiplexed 50 base single-read runs was performed on an  
102 Illumina HiSeq®2000 instrument (Illumina, Inc.) by the manufacturer's protocol. For the Harrison  
103 bees, total RNA was extracted from whole bodies using a GenElute Mammalian Total RNA Miniprep kit  
104 (Sigma-Aldrich) following the manufacturers' protocol. The six libraries were sequenced as multiplexed  
105 50 base single-read runs on an Illumina HiSeq 2500 system in rapid mode at the Edinburgh Genomics  
106 facility of the University of Edinburgh.

107 **Monoallelic methylation and expression - Bioinformatic analysis**

108 We searched for genes that were monoallelically methylated (present in both MeDip-seq (the putatively  
109 hypermethylated allele) and MRE-seq (the putatively hypomethylated allele) libraries), heterozygous  
110 (different alleles in the methylation libraries) and monoallelically expressed (only one allele present in the  
111 RNA-seq library).

112 **Alignment and bam refinement**

113 mRNA reads were aligned to the *Bombus terrestris* genome assembly (AELG00000000) using Tophat  
114 (Kim et al., 2013) and converted to bam files with Samtools (Li et al., 2009). Reads were labelled with  
115 the AddOrReplaceReadGroups.jar utility in Picard (<http://picard.sourceforge.net/>). The MRE-seq and  
116 MeDIP-seq reads were aligned to the genome using BWA mapper (Li and Durbin, 2009). The resultant  
117 sam alignments were soft-clipped with the CleanSam.jar utility in Picard and converted to bam format  
118 with Samtools. The Picard utility AddOrReplaceReadGroups.jar was used to label the MRE and MeDIP  
119 reads which were then locally re-aligned with GATK (DePristo et al., 2011; McKenna et al., 2010). PCR  
120 duplicates for all bams (mRNA, MeDIP and MRE) were marked with the Picard utility Markduplicates.jar.

121 **Identifying regions of interest and integrating data**

122 Coverage of each data type was calculated using GATK DepthofCoverage (McKenna et al., 2010). Only  
123 regions with a read depth of at least six in each of the libraries (RNA-seq, MeDIP-seq and MRE-seq) was  
124 used. Heterozygotes were identified using Samtools mpileup and bcftools on each data set separately (Li  
125 and Durbin, 2009) and results were merged with vcf tools (Danecek et al., 2011). Regions of mRNA with  
126 overlaps of MeDIP, MRE, and monoallelic snps were identified with custom perl scripts.

127 **Allele specific expression - Bioinformatic analysis**

128 We created a pipeline to search for heterozygous loci that show allele specific expression and identify the  
129 associated enriched gene ontology (GO) terms in twenty-nine previously published RNA-seq libraries  
130 (Harrison et al., 2015; Riddell et al., 2014).

131 Each RNA library was mapped to the *Bombus terrestris* reference genome (Bter 1.0, accession  
132 AELG00000000.1) (Sadd et al., 2015) using the BWA mapper (Li and Durbin, 2009). The combat method  
133 in the R package SVA (version 3.20.0) was used to remove any batch effects and control for original  
134 differences in coverage (Leek et al., 2012; Johnson et al., 2007). The success of this control was confirmed  
135 by the R package edgeR (version 3.14.0) (McCarthy et al., 2012; Robinson et al., 2010).

136 Bcftools (version 0.1.19-44428cd), bedtools (version 2.17.0), and samtools (version 0.1.19-44428cd)  
137 were used to prepare the RNA libraries and call the SNPs, before the SNPs were filtered based on mapping  
138 quality score (Quinlan and Hall, 2010; Li and Durbin, 2009). Only SNPs with a mapping quality score of  
139  $p < 0.05$  and a read depth of  $\geq 6$  were included in the analyses.

140 The R package, QuASAR implements a statistical method for: 1) genotyping from next-generation  
141 sequencing reads (according to the Hardy-Weinberg equilibrium), and 2) conducting inference on allele  
142 specific expression at heterozygous sites (Harvey et al., 2015). One problem with genotyping heterozy-  
143 gotes is being able to identical true homozygotes that appear heterozygote due to base-calling errors.  
144 QuASAR removes snps with extreme differential allele expression from the analyses, thus controlling for  
145 any base-calling errors. Despite this inherent conservatism, in benchmark tests, QuaSAR can accurately  
146 genotype loci with lower error rates than other methods commonly used for genotyping DNA-seq data  
147 (Harvey et al., 2015). The allele specific expression inference step takes into consideration the uncertainty  
148 in the genotype calls, base-call errors in sequencing, and allelic over-dispersion. QuASAR is a powerful  
149 tool for detecting allele specific expression if, as during most RNA-seq experiments, genotypes are not  
150 available (Harvey et al., 2015).

151 Sequence regions (the snp position +/- 2900bp), encompassing the loci identified as showing ASE  
152 in at least three of the thirty libraries, were compared to *Drosophila melanogaster* proteins (non-  
153 redundant (nr) database) with Blastx (Altschul et al., 1997). The blast results were annotated us-  
154 ing Blast2Go (Gotz et al., 2008). We carried out an enrichment analysis (Fisher exact test) using a  
155 custom R script (<https://dx.doi.org/10.6084/m9.figshare.3201355.v1>) on this list of GO terms. This  
156 identified GO terms that are overrepresented ( $p < 0.05$ ) relative to the entire bumblebee transcriptome  
157 (<https://dx.doi.org/10.6084/m9.figshare.3458828.v1>). We then used REVIGO to summarize and visualise  
158 these terms (Supek et al., 2011). REVIGO summarizes lists of GO terms using a clustering algorithm  
159 based on semantic similarity measures. To identify which bumblebee genes the snps were located in, the  
160 snp position +/- 25 bp was compared against the *Bombus terrestris* genome (Sadd et al., 2015) using  
161 Blastn.

## 162 Candidate gene allele specific qPCR

163 DNA was extracted from four bees from three Koppert colonies using the Qiagen DNA Micro kit according  
164 to manufacturer's instructions. RNA was extracted from samples of the heads of the same worker bees  
165 with the QIAGEN RNeasy Mini Kit according to manufacturer's instructions. cDNA was synthesized from  
166 a 8  $\mu$ l sample of RNA using the Tetro cDNA synthesis Kit (Bioline) as per manufacturer's instructions.

167 We amplified numerous fragments of the 19 candidate genes. Sanger sequencing results were analyzed  
168 using the heterozygote analysis module in Geneious version 7.3.0 to identify heterozygotic nucleotide  
169 positions. It was difficult to identify snps in exonic regions of the 19 loci, which could be amplified  
170 with primers of suitable efficiency. We managed to identify a suitable region in *toll-like receptor Tollo*  
171 (AELG01000623.1 exonic region 1838-2420).

172 The locus was run for 3 different reactions; T allele, G allele and reference. Reference primers were de-  
173 signed according to Gineikiene et al. (2009). A common reverse primer (CTGGTTCCCGTCCAATCTAA)  
174 was used for all three reactions. A reference forward primer (CGTGTCCAGAATCGACAATG) was  
175 designed to the same target heterozygote sequence, upstream of the heterozygote nucleotide position. The  
176 reference primers measure the total expression of the gene, whereas the allele specific primers (T allele:  
177 CCAGAATCGACAATGACTCGT, G allele: CAGAATCGACAATGACTCGG) measure the amount of  
178 expression due to the allele. Thus the ratio between the allele specific expression and reference locus  
179 expression would be the relative expression due to the allele.

180 Three replicate samples were run for each reaction. All reactions were prepared by the Corbett  
181 robotics machine, in 96 well qPCR plates (Thermo Scientific, UK). The qPCR reaction mix (20  $\mu$ l) was  
182 composed of 1  $\mu$ l of diluted cDNA (50ng/  $\mu$ l), 1  $\mu$ l of forward and reverse primer (5  $\mu$ M/  $\mu$ l each), 10  $\mu$ l  
183 2X SYBR Green JumpStart Taq ReadyMix (Sigma Aldrich, UK) and 7  $\mu$ l ddH<sub>2</sub>O. Samples were run in a  
184 PTC-200 MJ thermocycler. The qPCR profile was; 4 minutes at 95°C denaturation followed by 40 cycles

185 of 30s at 95°C, 30s at 59°C and 30s at 72°C and a final extension of 5 minutes at 72°C.

186 Forward primers are different, both in their terminal base (to match the snp) and in their length. It is  
187 entirely possible that they may amplify more or less efficiently even if there was no difference in amount  
188 of template (Pfaffl, 2001). To test for this we repeated all qPCRs with genomic DNA (1 µl of diluted  
189 DNA (20ng/ µl) from the same bees as the template. We would expect equal amounts of each allele in the  
190 genomic DNA. We also measured efficiency of each reaction as per Liu and Saint (2002).

191 Median  $C_t$  was calculated for each set of three technical replicates. A measure of relative expression  
192 (ratio) was calculated for each allele in each worker bee as follows:

$$ratio_{allele} = \frac{E_{allele}^{-C_{t,allele}}}{E_{reference}^{-C_{t,reference}}} \quad (1)$$

193 E is the median efficiency of each primer set (Liu and Saint, 2002; Pfaffl, 2001). All statistical analysis  
194 was carried out using R (3.3.1) (core Team, 2016).

### 195 Data Availability

196 All sequence data for this study are archived at the NCBI Sequence Read Archive (SRA) Accession no.  
197 PRJEB9366 and PRJNA391408. GO-analysis results and lists of differentially expressed transcripts are  
198 available as Supporting Information.

## 199 RESULTS

### 200 Discovery of monoallelically methylated and expressed genes

201 In total, we found nineteen genes that were both monoallelically methylated (present in both Me-  
202 DIP and MRE-seq libraries) and monoallelically expressed (only one allele present in the RNA-seq  
203 library). Figure 1 and Figure 2 show the coverage of the three libraries for two examples of these  
204 genes (*ras GTPase-activating protein nGAP-like* and *bicaudal-D*). Of the nineteen genes, fourteen had  
205 the hypermethylated (MeDIP) allele expressed, while five had the hypomethylated (MRE-seq) allele  
206 expressed (see supplementary table 1). The nineteen genes were compared to the nr/nt database using  
207 Blastn. Six returned noninformative hits (Table 2).

### 208 Confirmation of monoallelic expression

209 Monoallelic expression was confirmed in one of these nineteen (*toll-like receptor Tollo* (LOC100644648))  
210 by allele specific qPCR (Amarasinghe et al., 2015). The allele with a guanine at the snp position had  
211 a mean expression of  $6.04 \pm 8.28$  (standard deviation) in four bees from three different colonies. The  
212 thymine allele was not expressed at all in these bees. This was not due to the efficiency of the primers  
213 as the DNA controls of both alleles showed similar amplification (G mean =  $422.70 \pm 507.36$ , T mean  
214 =  $1575.17 \pm 503.02$ ). In the three other loci tested (*Ras GTPase-activating protein 1*, LOC107964816,  
215 *Elbow*) we found apparent monoallelic expression, but could not dismiss primer efficiency as the cause.

216 We then looked at these nineteen genes in twenty-nine previously published RNA-seq libraries. Fifteen  
217 of these nineteen genes expressed a single allele in all twenty nine RNA-seq libraries, see supplementary  
218 table 2. The remaining four genes were inconsistent; they showed expression of one allele in some *B.*  
219 *terrestris* workers, and expression of two alleles in other workers.

### 220 Removing batch effects

221 The twenty nine RNA-seq libraries do not come from the same experiment (Table 1). This gives rise to  
222 the possibility of batch effects, sources of variation due to samples not being from the same source or not  
223 being run together. We must remove these before any other analysis.

224 The mean GC content of the 29 libraries was 42.34%, with individual libraries having a similar GC  
225 content ranging from 40-46%. GC content differed with run (Nested ANOVA:  $F = 20.302$ ,  $df = 1$ ,  $p <$   
226  $0.001$ ), but not by colony (Nested ANOVA:  $F = 1.763$ ,  $df = 4$ ,  $p = 0.171$ ). The mean coverage of the  
227 29 libraries was 13.29, with mean library coverage ranging from 9.84 to 17.61. Run had an effect on  
228 coverage (Nested ANOVA:  $F = 7.554$ ,  $df = 1$ ,  $p = 0.011$ ), as did colony (Nested ANOVA:  $F = 6.962$ ,  $df =$   
229  $4$ ,  $p < 0.001$ ).

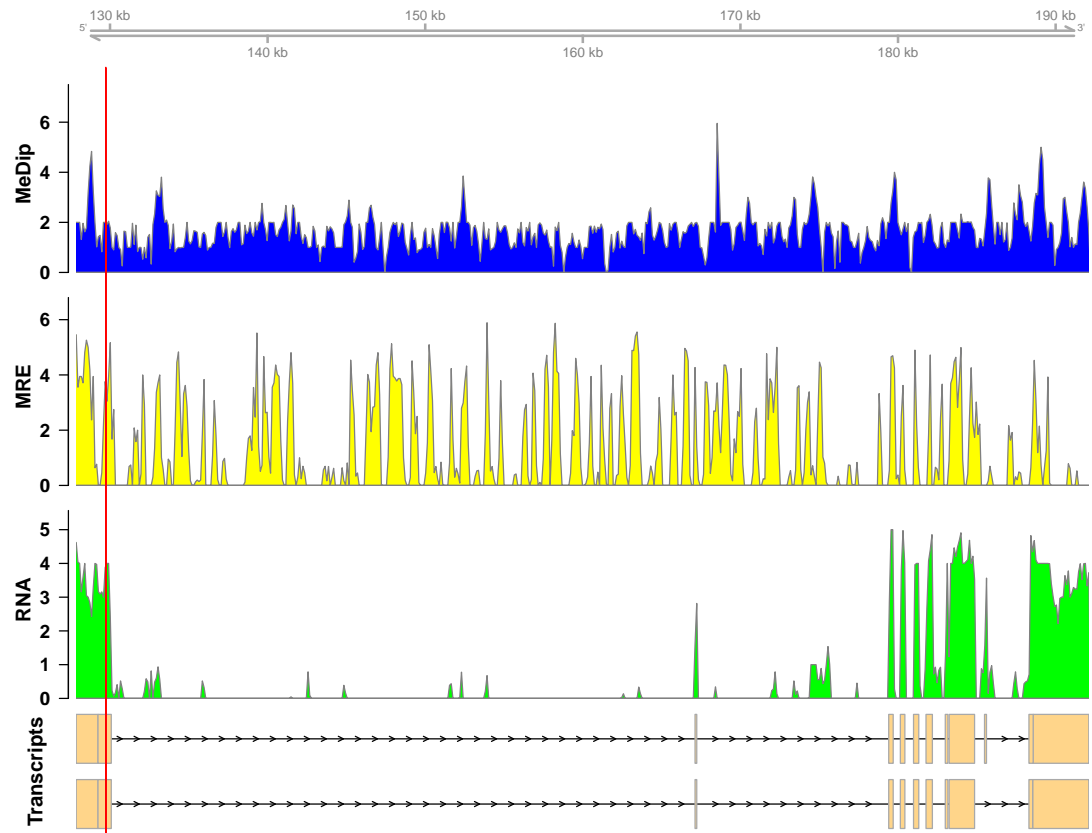

**Figure 1.** Coverage of the three libraries for *ras GTPase-activating protein nGAP-like* (LOC100652225). The transcript models come from GCF\_000214255.1\_Bter\_1.0. The y-axis in the coverage plots is log(1 + coverage). The red vertical line represents the heterozygote position. The MeDip allele was expressed in this locus, see Table 2).

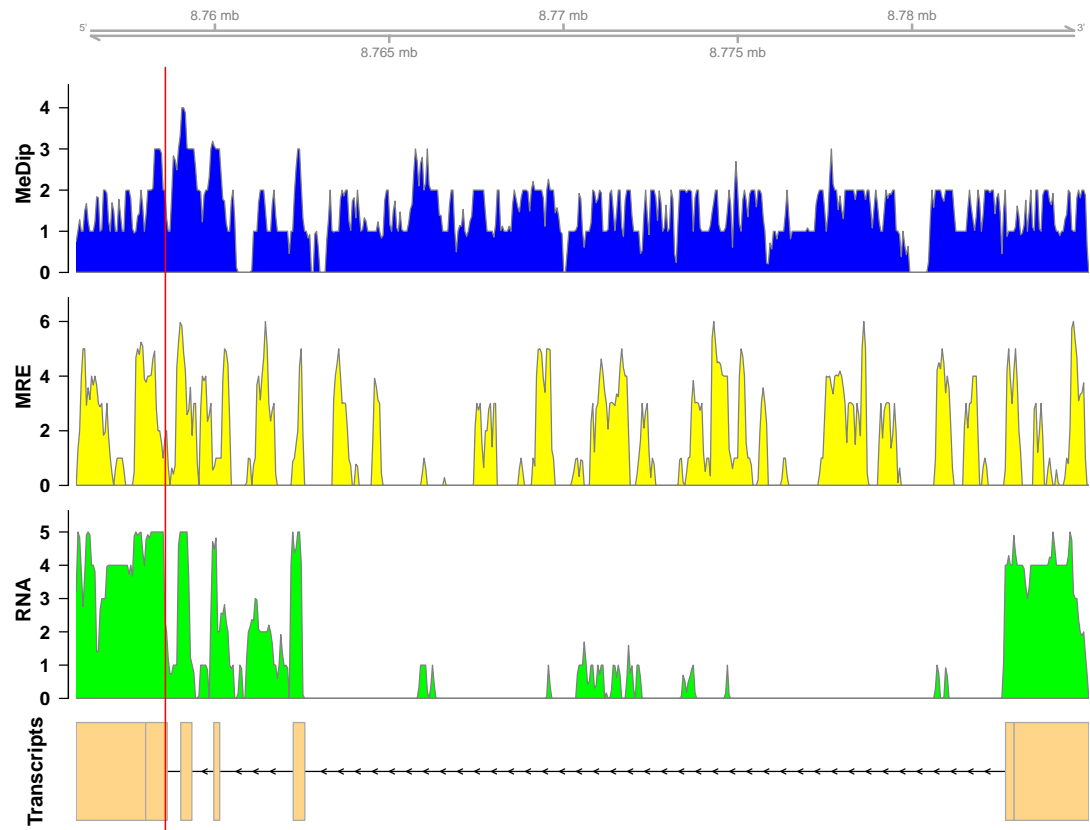

**Figure 2.** Coverage of the three libraries for *bicaudal D-related protein homolog* (LOC100650109). The transcript model come from GCF\_000214255.1\_Bter.1.0. The y-axis in the coverage plots is  $\log(1 + \text{coverage})$ . The red vertical line represents the heterozygote position. The MeDip allele was expressed in this locus, see Table 2).

| Gene                                              | Accession    | Expressed allele | Function                                                                                                                                                                                                                                                                                                                                                                                   |
|---------------------------------------------------|--------------|------------------|--------------------------------------------------------------------------------------------------------------------------------------------------------------------------------------------------------------------------------------------------------------------------------------------------------------------------------------------------------------------------------------------|
| <i>yippee-like 1</i>                              | LOC100642754 | MeDIP            | Yippee is an intracellular protein with a zinc-finger like domain. DNA methylation of a CpG island near the <i>yippee-like 3</i> promoter in humans represents a possible epigenetic mechanism leading to decreased gene expression in tumours (Kelley et al., 2010).                                                                                                                      |
| <i>toll-like receptor</i>                         | LOC100644648 | MeDIP            | Tollo regulates antimicrobial response in the insect respiratory epithelium (Akhouayri et al., 2011).                                                                                                                                                                                                                                                                                      |
| <i>zinc finger protein Elbow</i>                  | LOC100650465 | MeDIP            | The elbow (elB) gene is involved in the formation of the insect tracheal system (Dorfman et al., 2002).                                                                                                                                                                                                                                                                                    |
| <i>heterogeneous nuclear ribonucleoprotein A3</i> | LOC100651168 | MeDIP            | Heterogeneous nuclear ribonucleoproteins associated with precursors of functional, protein coding mRNAs (Dreyfuss et al., 1993).                                                                                                                                                                                                                                                           |
| <i>calmodulin-lysine N-methyltransferase-like</i> | LOC100749522 | MRE              | Calmodulin-lysine N-methyltransferase catalyses the trimethylation of a lysine residue of calmodulin. Calmodulin is a ubiquitous, calcium-dependent, eukaryotic signalling protein with a large number of interactors. The methylation state of calmodulin causes phenotypic changes in growth and developmental processes (Magnani et al., 2010).                                         |
| <i>Na/K/Ca exchanger CG1090</i>                   | LOC107998466 | MRE              | CG1090 functions in the maintenance of calcium homeostasis.                                                                                                                                                                                                                                                                                                                                |
| <i>Shaker</i>                                     | LOC100648438 | MeDIP            | Shaker is involved in the operation of potassium ion channel. <i>Shaker</i> expression was upregulated in sterile versus reproductive honeybee workers (Cardoen et al., 2011).                                                                                                                                                                                                             |
| <i>Centrosomal and chromosomal factor-like</i>    | LOC105665737 | MeDIP            | Essential protein required for proper condensation of mitotic chromosomes and progression through mitosis. Expressed during oogenesis in <i>Drosophila</i> (Kodjabachian et al., 1998).                                                                                                                                                                                                    |
| <i>excitatory amino acid transporter 1</i>        | LOC100744217 | MRE              | Excitatory amino acid transporters are neurotransmitter transporters. <i>Excitatory amino acid transporter 3</i> expression was upregulated in sterile honeybee workers (Cardoen et al., 2011). <i>Excitatory amino acid transporter 1</i> expression differences were also associated with worker - queen differentiation in the paper wasp <i>Polistes metricus</i> (Toth et al., 2014). |
| <i>aminopeptidase M1-like</i>                     | LOC105666993 | MeDIP            | M1 aminopeptidases are zinc-dependent enzymes that catalyze the removal of amino acids from the N terminus of polypeptides (Drinkwater et al., 2017).                                                                                                                                                                                                                                      |
| <i>ras GTPase-activating protein nGAP-like</i>    | LOC100652225 | MeDIP            | <i>Ras GTPase-activating protein 1</i> was found to be upregulated in reproductive honeybee workers (Cardoen et al., 2011). It is involved in oocyte meiosis.                                                                                                                                                                                                                              |
| <i>neuromedin-B receptor-like</i>                 | LOC100745453 | MeDIP            | In humans, this G protein-coupled receptor binds neuromedin B, a peptide that stimulates mitosis in gastrointestinal epithelial tissue.                                                                                                                                                                                                                                                    |
| <i>bicaudal D-related protein homolog</i>         | LOC100650109 | MeDIP            | Bicaudal is involved in embryonic pattern formation in <i>Drosophila</i> (Markesich et al., 2000). It is thought to be involved in the differentiation between soldiers and workers in the termite <i>Reticulitermes flavipes</i> (Scharf et al., 2003). <i>Bicaudal protein D</i> has been shown to be methylated more in eggs than sperm in honeybees (Drewell et al., 2014).            |

**Table 2.** The thirteen of the nineteen monoallelically methylated and expressed genes that returned informative blast hits.



230 Therefore, the combat method in the R package SVA (version 3.20.0) was used to remove any batch  
231 effects and control for original differences in coverage (Leek et al., 2012; Johnson et al., 2007). The  
232 success of this control was confirmed by the R package edgeR (version 3.14.0) (McCarthy et al., 2012;  
233 Robinson et al., 2010). The SVA adjustment reduced the edgeR dispersion value from 3.9994 (BCV=2) to  
234 0 (BCV=0.0003) (see Figure 3). That is we successfully removed the batch effects due to the separate  
235 runs.

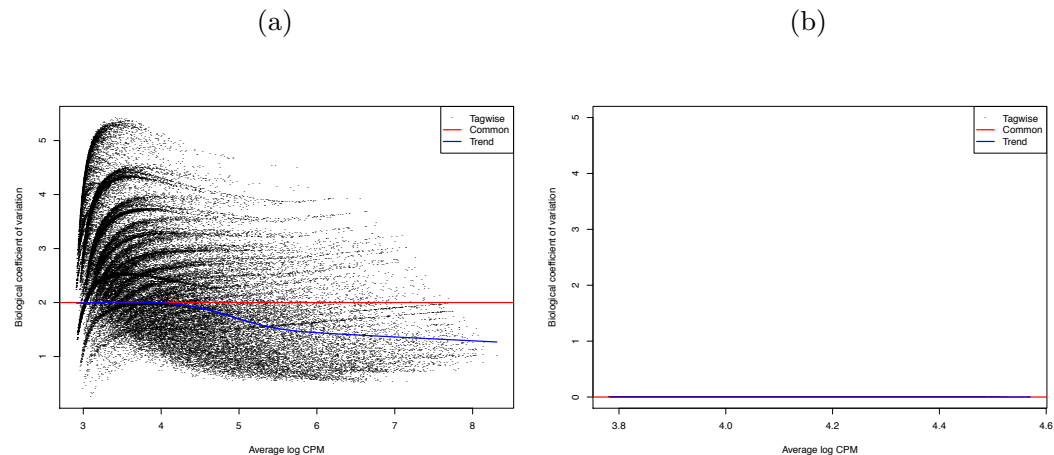

**Figure 3.** Biological coefficient of variation (BCV) of a) raw data, and b) SVA-adjusted data for the 29 RNA-seq *Bombus terrestris* libraries. The black dots represent the BCV if it were calculated individually for each gene (tagwise). The blue line is the trend of this data. The red line represents the BCV of the samples if a common dispersion value, over all genes, were used. In (b) tagwise values are exactly the same as common values so no black dots are visible.

### 236 Allele specific expression - RNA-seq

237 We then searched more generally for allele specific expression in the twenty-nine RNA-seq libraries.  
238 555 loci showed allele-specific expression in  $\geq 3$  of the 29 RNA-seq libraries (supplementary table 3).  
239 Comparing these loci against the *Bombus terrestris* genome using Blastn returned 211 hits. To search for  
240 gene ontology terms, we compared them against *Drosophila melanogaster* proteins, using Blastx, which  
241 returned 329 hits. We tested for enriched gene ontology (GO) terms against their background value in the  
242 bumblebee transcriptome. One hundred and fifty-one Gene Ontology(GO) terms were enriched in the 555  
243 regions showing allele specific expression (Fisher's exact test  $p > 0.05$ ), however none were significant at  
244 the more stringent FDR  $> 0.05$ . Figure 4 shows the large number of biological functions associated with  
245 these 555 genes.

## 246 DISCUSSION

247 An important caveat about the integrative analysis of monoallelic methylation and expression carried out  
248 here is that all three libraries were from a single bee. It is certain that there is variation in methylation  
249 and allele specific expression between bees just as there is in other species (Pignatta et al., 2014). We  
250 attempted to confirm this monoallelic expression in other bees using RNA-seq and qPCR but with limited  
251 success. This analysis is only a first step in understanding the link between monoallelic methylation and  
252 expression.

253 Of the nineteen genes displaying monoallelic methylation and monoallelic expression, fourteen had  
254 the hypermethylated (MeDIP) allele expressed, while five had the hypomethylated (MRE-seq) allele  
255 expressed (see supplementary table 1). In ant genes with allele specific methylation, the hypermethylated  
256 allele showed more expression than the hypomethylated allele (Bonasio et al., 2012). This fits with  
257 genome wide analysis that shows exonic methylation in insects associated with increased gene expression

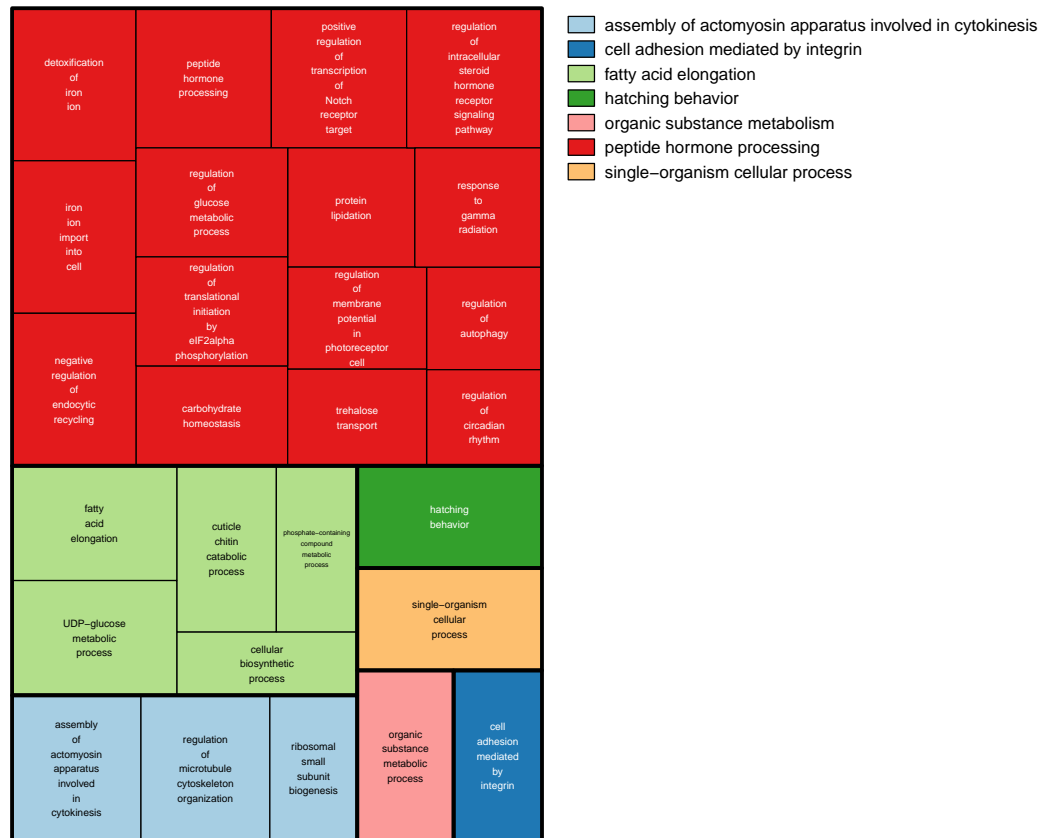

**Figure 4.** GO terms associated with allele specific expression. A summary of the enriched GO terms ( $p < 0.05$ , based on Blast2Go annotation) found for genes displaying allele specific expression. This figure was produced using Revigo (Supek et al., 2011). Each rectangle represents a single cluster of closely related GO terms. These rectangles are joined into different coloured ‘superclusters’ of loosely related terms. The area of the rectangles represents the p-value associated with that cluster’s enrichment.

258 (Glastad et al., 2014; Yan et al., 2015). Our fourteen genes with the hypermethylated allele expressed  
259 agree with this pattern. But how to explain the five genes where the hypomethylated allele was expressed?  
260 Firstly, the role of methylation in insect gene expression is not clear cut, with the relationship between  
261 exonic methylation and expression often disappearing at the gene level (Yan et al., 2015). For example,  
262 *EGFR* expression is lower in ant workers that exhibit higher DNA methylation of *EGFR* (Alvarado et al.,  
263 2015). Secondly, even in the canonical mammalian methylation system, the "wrong" allele has been  
264 shown to be expressed occasionally due to lineage specific effects (Dean et al., 1998; Pardo-Manuel de  
265 Villena et al., 2000; Onyango et al., 2002; Sapienza, 2002; Zhang et al., 1993).

266 We analysed RNA-seq libraries from different published sources. This lead to two confounding  
267 problems. The first is that as the samples were run at different times, using different machines this could  
268 lead to a batch effect. We were able to successfully remove this. The second, that the libraries were made  
269 from abdomens in some cases and whole bodies in others, is still a confounding effect. Allele specific  
270 expression is known to vary between tissues (Chamberlain et al., 2015). Any variation in which allele is  
271 expressed could be due to these tissue effects.

272 We looked at the expression of the nineteen genes in all twenty-nine RNA-seq libraries. If they are  
273 monoallelically expressed in these bees, we would find only one allele in a given RNA-seq library. Fifteen  
274 of these nineteen genes were confirmed to show a single allele in all twenty-nine RNA-seq libraries. We  
275 would also find only one allele if that bee was homozygous. We cannot rule out that these fifteen genes  
276 just happen to be homozygous in all twenty-nine bees from five different colonies from multiple sources.

277 The remaining four genes showed inconsistent expression with one allele being expressed in some *B.*  
278 *terrestris* workers, and expression of two alleles in other workers. Natural intraspecific variation in allele  
279 specific expression has been found in other species (Pignatta et al., 2014). The tissue variation mentioned  
280 above is also a possibility. Another explanation is that these loci are not epigenetically controlled but  
281 rather their allele specific expression is derived from genetic effects (Remnant et al., 2016).

282 There are three main genetic, as opposed to epigenetic, affectors of allele specific expression (Edsgard  
283 et al., 2016). Allele specific expression can be caused by differences in the alleles' sequence within  
284 the translated part resulting in a modified protein. A change at the alleles' cis regulatory sites, could  
285 cause differential binding of transcription factors. Transcript processing can be affected by a change in  
286 the alleles' sequence a splice site or untranslated region. This large number of possible causes of allele  
287 specific expression could explain why we see so many functions associated with the 555 genes showing  
288 allele specific expression (Table 4).

289 But it is not just allele specific expression that may have genetic as well as epigenetic effects. It  
290 has been shown in humans that some allele specific methylation is determined by DNA sequence in cis  
291 and therefore shows Mendelian inheritance patterns (Meaburn et al., 2010). An extreme example of  
292 genetically controlled allele specific methylation is found in *Nasonia* wasps, where there is no evidence  
293 for methylation driven allele specific expression but inheritable cis-mediated allele specific methylation  
294 has been found (Wang et al., 2016). This cis-mediated methylation has recently been suggested as being  
295 important in social insect biology (Remnant et al., 2016; Wedd et al., 2016).

296 We have found that allele specific expression is widespread in the bumblebee. We have also found that  
297 the extreme version of allele specific expression, monoallelic expression is associated with monoallelic  
298 methylation. Genomic imprinting in mammals usually involves monoallelic methylation and expression.  
299 Although tempting to associate our results with genomic imprinting, this current work is unable to identify  
300 genomic imprinting. In any case, caution should be applied due to the lack of understanding of the  
301 functional role of methylation in gene expression in insects and in the, as yet unquantified, role of genetic  
302 cis effects in insect allele specific methylation and expression.

## 303 ACKNOWLEDGEMENTS

304 This work was financially supported by NERC grant no. NE/H010408/1 and NE/N010019/1 and NERC  
305 Biomolecular Analysis Facility research grants (NBAF 606 and 829) to EBM. Illumina library prepara-  
306 tion, sequencing and bioinformatics were carried out by Edinburgh Genomics, The University of  
307 Edinburgh. Edinburgh Genomics is partly supported through core grants from NERC (R8/H10/56), MRC  
308 (MR/K001744/1) and BBSRC (BB/J004243/1). ZNL would like to thank UK BBSRC for its financial  
309 support via MIBTP. The funders had no role in study design, data collection and analysis, decision to  
310 publish, or preparation of the manuscript.

## 311 SUPPORTING INFORMATION LEGENDS

312 **Table S1. Nineteen genes showing both monoallelic methylation and monoallelic expression.** Blast  
313 results and genomic coordinates of the reads from the RNA-seq, MRE-seq and MeDip-seq libraries.

314 **Table S2. Confirmation of single allele expression of nineteen monoallelically expressed genes in  
315 twenty-nine previously published transcriptomes.** For each of the 19 contigs are the previously  
316 published RNA-seq libraries with associated read counts.

317 **Table S3. 555 genes showing allele specific expression in at least three of the 29 previously pub-  
318 lished RNA-seq libraries.** This table details the blast results from both the bumblebee and  
319 drosophila genomes and the GO terms associated with the drosophila hits.

## 320 ETHICAL DECLARATION

321 The protocol reported here conforms to the regulatory requirements for animal experimentation in the  
322 United Kingdom.

## 323 REFERENCES

- 324 Akhouayri, I., Turc, C., Royet, J., and Charroux, B. (2011). Toll-8/Tollo negatively regulates antimicrobial  
325 response in the Drosophila respiratory epithelium. *PLoS pathogens*, 7(10):e1002319.
- 326 Altschul, S. F., Madden, T. L., Schaffer, A. A., Zhang, J. H., Zhang, Z., Miller, W., and Lipman, D. J.  
327 (1997). Gapped BLAST and PSI-BLAST: a new generation of protein database search programs.  
328 *Nucleic Acids Research*, 25:3389–3402. 17.
- 329 Alvarado, S., Rajakumar, R., Abouheif, E., and Szyf, M. (2015). Epigenetic variation in the Egfr gene  
330 generates quantitative variation in a complex trait in ants. *Nat Commun*, 6.
- 331 Amarasinghe, H., Toghiani, B., Nathanael, D., and Mallon, E. B. (2015). Allele specific expression in  
332 worker reproduction genes in the bumblebee *Bombus terrestris*. *PeerJ*, 3:e1079.
- 333 Amarasinghe, H. E., Clayton, C. I., and Mallon, E. B. (2014). Methylation and worker reproduction  
334 in the bumble-bee (*Bombus terrestris*). *Proceedings of the Royal Society B: Biological Sciences*,  
335 281(1780):20132502.
- 336 Bird, A. (2002). DNA methylation patterns and epigenetic memory. *Genes & Development*, 16(1):6–21.
- 337 Bonasio, R., Li, Q., Lian, J., Mutti, N. S., Jin, L., Zhao, H., Zhang, P., Wen, P., Xiang, H., Ding, Y., Jin,  
338 Z., Shen, S. S., Wang, Z., Wang, W., Wang, J., Berger, S. L., Liebig, J., Zhang, G., and Reinberg, D.  
339 (2012). Genome-wide and Caste-Specific DNA Methylomes of the Ants *Camponotus floridanus* and  
340 *Harpegnathos saltator*. *Current Biology*, 22(19):1755–1764.
- 341 Cardoen, D., Wenseleers, T., Ernst, U. R., Danneels, E. L., Laget, D., DE Graaf, D. C., Schoofs, L., and  
342 Verleyen, P. (2011). Genome-wide analysis of alternative reproductive phenotypes in honeybee workers.  
343 *Molecular Ecology*, 20(19):4070–4084.
- 344 Chamberlain, A. J., Vander Jagt, C. J., Hayes, B. J., Khansefid, M., Marett, L. C., Millen, C. A., Nguyen,  
345 T. T. T., and Goddard, M. E. (2015). Extensive variation between tissues in allele specific expression in  
346 an outbred mammal. *BMC Genomics*, 16.
- 347 Chittka, A., Wurm, Y., and Chittka, L. (2012). Epigenetics: The making of ant castes. *Current Biology*,  
348 22(19):R835–R838.
- 349 core Team, R. (2016). R: A language and environment for statistical computing.
- 350 Danecek, P., Auton, A., Abecasis, G., Albers, C. A., Banks, E., DePristo, M. A., Handsaker, R. E.,  
351 Lunter, G., Marth, G. T., Sherry, S. T., McVean, G., and Durbin, R. (2011). The variant call format and  
352 VCFtools. *Bioinformatics*, 27(15):2156–2158.
- 353 Dean, W., Bowden, L., Aitchison, A., Klose, J., Moore, T., Meneses, J. J., Reik, W., and Feil, R. (1998).  
354 Altered imprinted gene methylation and expression in completely ES cell-derived mouse fetuses:  
355 association with aberrant phenotypes. *Development (Cambridge, England)*, 125(12):2273–2282.
- 356 DePristo, M. A., Banks, E., Poplin, R., Garimella, K. V., Maguire, J. R., Hartl, C., Philippakis, A. A., del  
357 Angel, G., Rivas, M. A., Hanna, M., McKenna, A., Fennell, T. J., Kernysky, A. M., Sivachenko, A. Y.,  
358 Cibulskis, K., Gabriel, S. B., Altshuler, D., and Daly, M. J. (2011). A framework for variation discovery  
359 and genotyping using next-generation DNA sequencing data. *Nature Genetics*, 43(5):491–498.

- 360 Dorfman, R., Glazer, L., Weihe, U., Wernet, M. F., and Shilo, B.-Z. (2002). Elbow and Noc define a  
361 family of zinc finger proteins controlling morphogenesis of specific tracheal branches. *Development*  
362 (*Cambridge, England*), 129(15):3585–3596.
- 363 Drewell, R. A., Bush, E. C., Remnant, E. J., Wong, G. T., Beeler, S. M., Stringham, J. L., Lim, J., and  
364 Oldroyd, B. P. (2014). The dynamic DNA methylation cycle from egg to sperm in the honey bee *Apis*  
365 *mellifera*. *Development*, 141(13):2702–2711.
- 366 Dreyfuss, G., Matunis, M. J., Piñol-Roma, S., and Burd, C. G. (1993). hnRNP proteins and the biogenesis  
367 of mRNA. *Annual Review of Biochemistry*, 62:289–321.
- 368 Drinkwater, N., Lee, J., Yang, W., Malcolm, T. R., and McGowan, S. (2017). M1 aminopeptidases as  
369 drug targets: broad applications or therapeutic niche? *The FEBS journal*, 284(10):1473–1488.
- 370 Edsgard, D., Iglesias, M. J., Reilly, S.-J., Hamsten, A., Tornvall, P., Odeberg, J., and Emanuelsson,  
371 O. (2016). GeneiASE: Detection of condition-dependent and static allele-specific expression from  
372 RNA-seq data without haplotype information. *Scientific Reports*, 6:21134.
- 373 Farh, K. K.-H., Grimson, A., Jan, C., Lewis, B. P., Johnston, W. K., Lim, L. P., Burge, C. B., and Bartel,  
374 D. P. (2005). The widespread impact of mammalian MicroRNAs on mRNA repression and evolution.  
375 *Science (New York, N.Y.)*, 310(5755):1817–1821.
- 376 Galbraith, D. A., Kocher, S. D., Glenn, T., Albert, I., Hunt, G. J., Strassmann, J. E., Queller, D. C., and  
377 Grozinger, C. M. (2016). Testing the kinship theory of intragenomic conflict in honey bees (*Apis*  
378 *mellifera*). *Proceedings of the National Academy of Sciences*, page 201516636.
- 379 Gineikiene, E., Stoskus, M., and Griskevicius, L. (2009). Single Nucleotide Polymorphism-Based System  
380 Improves the Applicability of Quantitative PCR for Chimerism Monitoring. *The Journal of Molecular*  
381 *Diagnostics : JMD*, 11(1):66–74.
- 382 Glastad, K. M., Hunt, B. G., and Goodisman, M. A. (2014). Evolutionary insights into DNA methylation  
383 in insects. *Current Opinion in Insect Science*, 1:25–30.
- 384 Glastad, K. M., Hunt, B. G., Yi, S. V., and Goodisman, M. a. D. (2011). DNA methylation in insects: on  
385 the brink of the epigenomic era. *Insect Molecular Biology*, 20(5):553–565.
- 386 Goldberg, A., Allis, C., and Bernstein, E. (2007). Epigenetics: A Landscape Takes Shape. *Cell*,  
387 128(4):635–638.
- 388 Gotz, S., García-Gómez, J. M., Terol, J., Williams, T. D., Nagaraj, S. H., Nueda, M. J., Robles, M., Talón,  
389 M., Dopazo, J., and Conesa, A. (2008). High-throughput functional annotation and data mining with  
390 the Blast2go suite. *Nucleic Acids Research*, 36(10):3420–3435.
- 391 Harris, R. A., Wang, T., Coarfa, C., Nagarajan, R. P., Hong, C., Downey, S. L., Johnson, B. E., Fouse,  
392 S. D., Delaney, A., Zhao, Y., Olshen, A., Ballinger, T., Zhou, X., Forsberg, K. J., Gu, J., Echipare, L.,  
393 O’Geen, H., Lister, R., Pelizzola, M., Xi, Y., Epstein, C. B., Bernstein, B. E., Hawkins, R. D., Ren, B.,  
394 Chung, W.-Y., Gu, H., Bock, C., Gnirke, A., Zhang, M. Q., Haussler, D., Ecker, J. R., Li, W., Farnham,  
395 P. J., Waterland, R. A., Meissner, A., Marra, M. A., Hirst, M., Milosavljevic, A., and Costello, J. F.  
396 (2010). Comparison of sequencing-based methods to profile DNA methylation and identification of  
397 monoallelic epigenetic modifications. *Nature biotechnology*, 28(10):1097–1105.
- 398 Harrison, M. C., Hammond, R. L., and Mallon, E. B. (2015). Reproductive workers show queen-like  
399 gene expression in an intermediately eusocial insect, the buff-tailed bumble bee *Bombus terrestris*.  
400 *Molecular Ecology*, 24:121–129.
- 401 Harvey, C. T., Moyerbrailean, G. A., Davis, G. O., Wen, X., Luca, F., and Pique-Regi, R. (2015). QuASAR:  
402 quantitative allele-specific analysis of reads. *Bioinformatics*, 31(8):1235–1242.
- 403 Johnson, W. E., Li, C., and Rabinovic, A. (2007). Adjusting batch effects in microarray expression data  
404 using empirical Bayes methods. *Biostatistics*, 8(1):118–127.
- 405 Kelley, K., Miller, K. R., Todd, A., Kelley, A., Tuttle, R., and Berberich, S. J. (2010). YPEL3, a  
406 p53-regulated gene that induces cellular senescence. *Cancer research*, 70(9):3566–3575.
- 407 Kim, D., Pertea, G., Trapnell, C., Pimentel, H., Kelley, R., and Salzberg, S. L. (2013). TopHat2: accurate  
408 alignment of transcriptomes in the presence of insertions, deletions and gene fusions. *Genome Biology*,  
409 14(4):R36.
- 410 Kocher, S. D., Tsuruda, J. M., Gibson, J. D., Emore, C. M., Arechavaleta-Velasco, M. E., Queller, D. C.,  
411 Strassmann, J. E., Grozinger, C. M., Gribskov, M. R., San Miguel, P., Westerman, R., and Hunt, G. J.  
412 (2015). A Search for Parent-of-Origin Effects on Honey Bee Gene Expression. *G3 (Bethesda, Md.)*.
- 413 Kodjabachian, L., Delaage, M., Maurel, C., Miassod, R., Jacq, B., and Rosset, R. (1998). Mutations in  
414 *ccf*, a novel *Drosophila* gene encoding a chromosomal factor, affect progression through mitosis and

- 415 interact with Pc-G mutations. *The EMBO Journal*, 17(4):1063–1075.
- 416 Leek, J. T., Johnson, W. E., Parker, H. S., Jaffe, A. E., and Storey, J. D. (2012). The sva package for  
417 removing batch effects and other unwanted variation in high-throughput experiments. *Bioinformatics*,  
418 28(6):882–883.
- 419 Li, H. and Durbin, R. (2009). Fast and accurate short read alignment with Burrows-Wheeler transform.  
420 *Bioinformatics (Oxford, England)*, 25(14):1754–1760.
- 421 Li, H., Handsaker, B., Wysoker, A., Fennell, T., Ruan, J., Homer, N., Marth, G., Abecasis, G., Durbin, R.,  
422 and 1000 Genome Project Data Processing Subgroup (2009). The Sequence Alignment/Map format  
423 and SAMtools. *Bioinformatics (Oxford, England)*, 25(16):2078–2079.
- 424 Liu, W. and Saint, D. A. (2002). A New Quantitative Method of Real Time Reverse Transcription  
425 Polymerase Chain Reaction Assay Based on Simulation of Polymerase Chain Reaction Kinetics.  
426 *Analytical Biochemistry*, 302(1):52–59.
- 427 Magnani, R., Dirk, L. M. A., Trievel, R. C., and Houtz, R. L. (2010). Calmodulin methyltransferase is an  
428 evolutionarily conserved enzyme that trimethylates Lys-115 in calmodulin. *Nature Communications*,  
429 1:43.
- 430 Markesich, D. C., Gajewski, K. M., Nazimiec, M. E., and Beckingham, K. (2000). bicaudal encodes the  
431 Drosophila beta NAC homolog, a component of the ribosomal translational machinery\*. *Development*  
432 *(Cambridge, England)*, 127(3):559–572.
- 433 McCarthy, D. J., Chen, Y., and Smyth, G. K. (2012). Differential expression analysis of multifactor  
434 RNA-Seq experiments with respect to biological variation. *Nucleic Acids Research*, 40(10):4288–4297.
- 435 McKenna, A., Hanna, M., Banks, E., Sivachenko, A., Cibulskis, K., Kernytsky, A., Garimella, K.,  
436 Altshuler, D., Gabriel, S., Daly, M., and DePristo, M. A. (2010). The Genome Analysis Toolkit:  
437 A MapReduce framework for analyzing next-generation DNA sequencing data. *Genome Research*,  
438 20(9):1297–1303.
- 439 Meaburn, E. L., Schalkwyk, L. C., and Mill, J. (2010). Allele-specific methylation in the human genome:  
440 implications for genetic studies of complex disease. *Epigenetics*, 5(7):578–582.
- 441 Onyango, P., Jiang, S., Uejima, H., Shablott, M. J., Gearhart, J. D., Cui, H., and Feinberg, A. P. (2002).  
442 Monoallelic expression and methylation of imprinted genes in human and mouse embryonic germ  
443 cell lineages. *Proceedings of the National Academy of Sciences of the United States of America*,  
444 99(16):10599–10604.
- 445 Palacios, R., Gazave, E., Goñi, J., Piedrafita, G., Fernando, O., Navarro, A., and Villoslada, P. (2009).  
446 Allele-Specific Gene Expression Is Widespread Across the Genome and Biological Processes. *PLoS*  
447 *ONE*, 4(1):e4150.
- 448 Pardo-Manuel de Villena, F., de la Casa-Esperón, E., and Sapienza, C. (2000). Natural selection and the  
449 function of genome imprinting: beyond the silenced minority. *Trends in genetics: TIG*, 16(12):573–579.
- 450 Pfaffl, M. W. (2001). A new mathematical model for relative quantification in real-time RT-PCR. *Nucleic*  
451 *Acids Research*, 29(9):e45–e45.
- 452 Pignatta, D., Erdmann, R. M., Scheer, E., Picard, C. L., Bell, G. W., and Gehring, M. (2014). Natu-  
453 ral epigenetic polymorphisms lead to intraspecific variation in Arabidopsis gene imprinting. *eLife*,  
454 3:e03198.
- 455 Queller, D. C. (2003). Theory of genomic imprinting conflict in social insects. *Bmc Evolutionary Biology*,  
456 3:art. no.–15.
- 457 Quinlan, A. R. and Hall, I. M. (2010). BEDTools: a flexible suite of utilities for comparing genomic  
458 features. *Bioinformatics (Oxford, England)*, 26(6):841–842.
- 459 Reik, W. and Walter, J. (2001). Genomic imprinting: Parental influence on the genome. *Nature Reviews*  
460 *Genetics*, 2:21–32. 1.
- 461 Remnant, E. J., Ashe, A., Young, P. E., Buchmann, G., Beekman, M., Allsopp, M. H., Suter, C. M.,  
462 Drexell, R. A., and Oldroyd, B. P. (2016). Parent-of-origin effects on genome-wide DNA methylation  
463 in the Cape honey bee (*Apis mellifera capensis*) may be confounded by allele-specific methylation.  
464 *BMC Genomics*, 17(1).
- 465 Riddell, C. E., Garces, J. D. L., Adams, S., Barribeau, S. M., Twell, D., and Mallon, E. B. (2014).  
466 Differential gene expression and alternative splicing in insect immune specificity. *BMC Genomics*,  
467 15(1):1031.
- 468 Robinson, M. D., McCarthy, D. J., and Smyth, G. K. (2010). edgeR: a Bioconductor package for  
469 differential expression analysis of digital gene expression data. *Bioinformatics*, 26(1):139–140.

- 470 Sadd, B. M., Barribeau, S. M., Bloch, G., Graaf, D. C. d., Dearden, P., Elsik, C. G., Gadau, J., Grimme-  
471 likhuijzen, C. J., Hasselmann, M., Lozier, J. D., Robertson, H. M., Smagghe, G., Stolle, E., Vaerenbergh,  
472 M. V., Waterhouse, R. M., Bornberg-Bauer, E., Klasberg, S., Bennett, A. K., Câmara, F., Guigó, R.,  
473 Hoff, K., Mariotti, M., Munoz-Torres, M., Murphy, T., Santasmasses, D., Amdam, G. V., Beckers, M.,  
474 Beye, M., Biewer, M., Bitondi, M. M., Blaxter, M. L., Bourke, A. F., Brown, M. J., Buechel, S. D.,  
475 Cameron, R., Cappelle, K., Carolan, J. C., Christiaens, O., Ciborowski, K. L., Clarke, D. F., Colgan,  
476 T. J., Collins, D. H., Cridge, A. G., Dalmay, T., Dreier, S., Plessis, L. d., Duncan, E., Erler, S., Evans, J.,  
477 Falcon, T., Flores, K., Freitas, F. C., Fuchikawa, T., Gempe, T., Hartfelder, K., Hauser, F., Helbing, S.,  
478 Humann, F. C., Irvine, F., Jermiin, L. S., Johnson, C. E., Johnson, R. M., Jones, A. K., Kadowaki, T.,  
479 Kidner, J. H., Koch, V., Köhler, A., Kraus, F. B., Lattorff, H. M., Leask, M., Lockett, G. A., Mallon,  
480 E. B., Antonio, D. S. M., Marxer, M., Meeus, I., Moritz, R. F., Nair, A., Näpflin, K., Nissen, I., Niu,  
481 J., Nunes, F. M., Oakeshott, J. G., Osborne, A., Otte, M., Pinheiro, D. G., Rossié, N., Rueppell, O.,  
482 Santos, C. G., Schmid-Hempel, R., Schmitt, B. D., Schulte, C., Simões, Z. L., Soares, M. P., Swevers,  
483 L., Winnebeck, E. C., Wolschin, F., Yu, N., Zdobnov, E. M., Aqrabi, P. K., Blankenburg, K. P., Coyle,  
484 M., Francisco, L., Hernandez, A. G., Holder, M., Hudson, S., Jackson, L., Jayaseelan, J., Joshi, V.,  
485 Kovar, C., Lee, S. L., Mata, R., Mathew, T., Newsham, I. F., Ngo, R., Okwuonu, G., Pham, C., Pu,  
486 L.-L., Saada, N., Santibanez, J., Simmons, D., Thornton, R., Venkat, A., Walden, K. K., Wu, Y.-Q.,  
487 Debysier, G., Devreese, B., Asher, C., Blommaert, J., Chipman, A. D., Chittka, L., Fouks, B., Liu, J.,  
488 O'Neill, M. P., Sumner, S., Puiu, D., Qu, J., Salzberg, S. L., Scherer, S. E., Muzny, D. M., Richards, S.,  
489 Robinson, G. E., Gibbs, R. A., Schmid-Hempel, P., and Worley, K. C. (2015). The genomes of two key  
490 bumblebee species with primitive eusocial organization. *Genome Biology*, 16(1):76.
- 491 Sapienza, C. (2002). Imprinted gene expression, transplantation medicine, and the “other” human  
492 embryonic stem cell. *Proceedings of the National Academy of Sciences of the United States of America*,  
493 99(16):10243–10245.
- 494 Scharf, M. E., Wu-Scharf, D., Pittendrigh, B. R., and Bennett, G. W. (2003). Caste and development-  
495 associated gene expression in a lower termite. *Genome Biology*, 4(10):R62.
- 496 Supek, F., Bošnjak, M., Škunca, N., and Šmuc, T. (2011). REVIGO Summarizes and Visualizes Long  
497 Lists of Gene Ontology Terms. *PLoS ONE*, 6(7):e21800.
- 498 Toth, A. L., Tooker, J. F., Radhakrishnan, S., Minard, R., Henshaw, M. T., and Grozinger, C. M.  
499 (2014). Shared genes related to aggression, rather than chemical communication, are associated with  
500 reproductive dominance in paper wasps (*Polistes metricus*). *BMC Genomics*, 15(1):75.
- 501 Wang, X., Werren, J. H., and Clark, A. G. (2016). Allele-Specific Transcriptome and Methylome  
502 Analysis Reveals Stable Inheritance and Cis-Regulation of DNA Methylation in *Nasonia*. *PLOS Biol*,  
503 14(7):e1002500.
- 504 Wedd, L., Kucharski, R., and Maleszka, R. (2016). Differentially methylated obligatory epialleles  
505 modulate context-dependent LAM gene expression in the honeybee *Apis mellifera*. *Epigenetics*,  
506 11(1):1–10.
- 507 Weiner, S. A. and Toth, A. L. (2012). Epigenetics in social insects: a new direction for understanding the  
508 evolution of castes. *Genetics research international*, 2012:609810.
- 509 Welch, M. and Lister, R. (2014). Epigenomics and the control of fate, form and function in social insects.  
510 *Current Opinion in Insect Science*, 1:31–38.
- 511 Yan, H., Bonasio, R., Simola, D. F., Liebig, J., Berger, S. L., and Reinberg, D. (2015). DNA Methylation in  
512 Social Insects: How Epigenetics Can Control Behavior and Longevity. *Annual Review of Entomology*,  
513 60(1):435–452.
- 514 Yan, H., Simola, D. F., Bonasio, R., Liebig, J., Berger, S. L., and Reinberg, D. (2014). Eusocial insects as  
515 emerging models for behavioural epigenetics. *Nature Reviews Genetics*, 15(10):677–688.
- 516 Zhang, Y., Shields, T., Crenshaw, T., Hao, Y., Moulton, T., and Tycko, B. (1993). Imprinting of human  
517 H19: allele-specific CpG methylation, loss of the active allele in Wilms tumor, and potential for somatic  
518 allele switching. *American Journal of Human Genetics*, 53(1):113–124.
